# Supplementary material for: Peptide-induced immune regulation by a promiscuous and immunodominant CD4T-cell epitope of Timothy grass pollen: a role of Cbl-b and Itch in regulation
Source: HighWire-hosted journal article supplement (doi:10.1136/thoraxjnl-2013-204324), 2013-11-20

Supplementary Figure 1. Effector memory phenotype of Phl p 5 p26 tetramer+ CD4+ T cells from allergic subjects. PBMC isolated from allergic subjects were labelled immediately ex vivo with Phl p 5b peptide 26 tetramer. This was followed by cell surface staining with FL-1 conjugated cell surface maker antibodies and an anti-CD4PE-Cy5. The expression of a FL-1 conjugated cell surface maker antibody was compared on total CD4<sup>high</sup> and CD4+ HLA-DR1 Phl p 5 p26 tetramer+ cells from HLA-DR1, grass-allergic subjects. The reduction in MFI for CD62L and CD45RA staining of tetramer+ cells is shown. Statistical analysis was performed using a Wilcoxon signed rank test. Samples were processed during the grass pollen season Summer 2010.

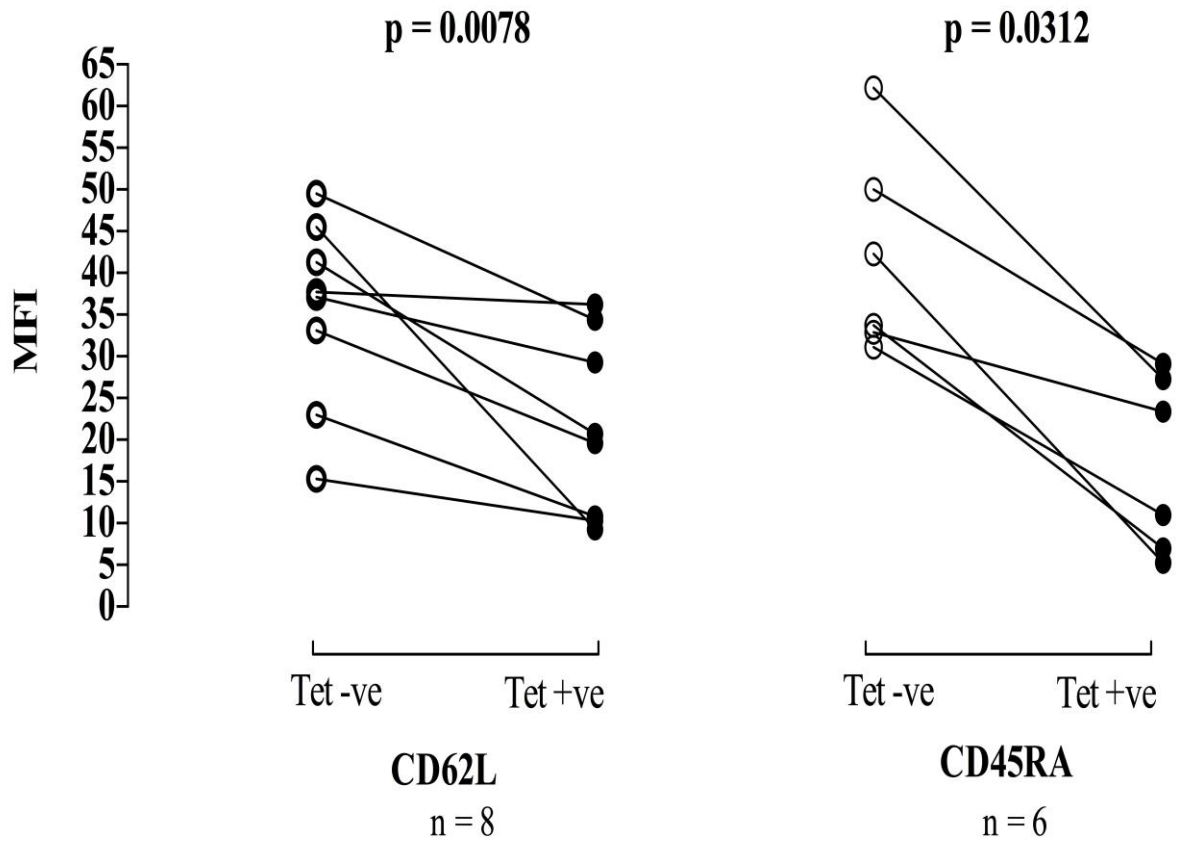

Supplement: thoraxjnl-2013-204324supp_figure.pdf [file thoraxjnl-2013-204324supp_figure.pdf]
